# Supplementary material for: Functionally distinct cancer-associated fibroblast subpopulations establish a tumor promoting environment in squamous cell carcinoma
Source: PubMed Central journal article supplement (PMC10480447; doi:10.1038/s41467-023-41141-9), 2023-09-05
Supplement: 41467_2023_41141_MOESM10_ESM.pdf [file 41467_2023_41141_MOESM10_ESM.pdf]

**Title:** Supplementary Data 1

**Description:** Gene expression in each cluster of all integrated scRNA-seq samples

**Title:** Supplementary Data 2

**Description:** Gene expression in each fibroblast cluster compared to all other fibroblasts

**Title:** Supplementary Data 3

**Description:** Gene expression in each CAF cluster.

**Title:** Supplementary Data 4

**Description:** Representative marker genes for cSCC-related CAFs.

**Title:** Supplementary Data 5

**Description:** Gene expression in each BCC fibroblast cluster.

**Title:** Supplementary Data 6

**Description:** Gene expression in each BCC CAF cluster (high expression of FAP, ACTA2 & cSCC-related CAF marker genes).
